# Supplementary material for: Sex-Specific Microglial Activation and SARS-CoV-2 Receptor Expression Induced by Chronic Unpredictable Stress
Source: PubMed Central journal article supplement (PMC8654352; doi:10.3389/fncel.2021.750373), 2021-11-24
Supplement: Data_Sheet_1.pdf [file Data_Sheet_1.pdf]

**Supplementary figure 1. Behavioral changes after CUMS.** (A) Bodyweight measurements of female and male mice during 5 weeks of CUMS treatment. (B) Total distance moved and (C) ratio of time spent in corners versus center in open field test. CUMS had main effect on open field corner/center ratio (C,  $F(1, 15) = 7.29$ ,  $p < 0.05$ , 2-way ANOVA).

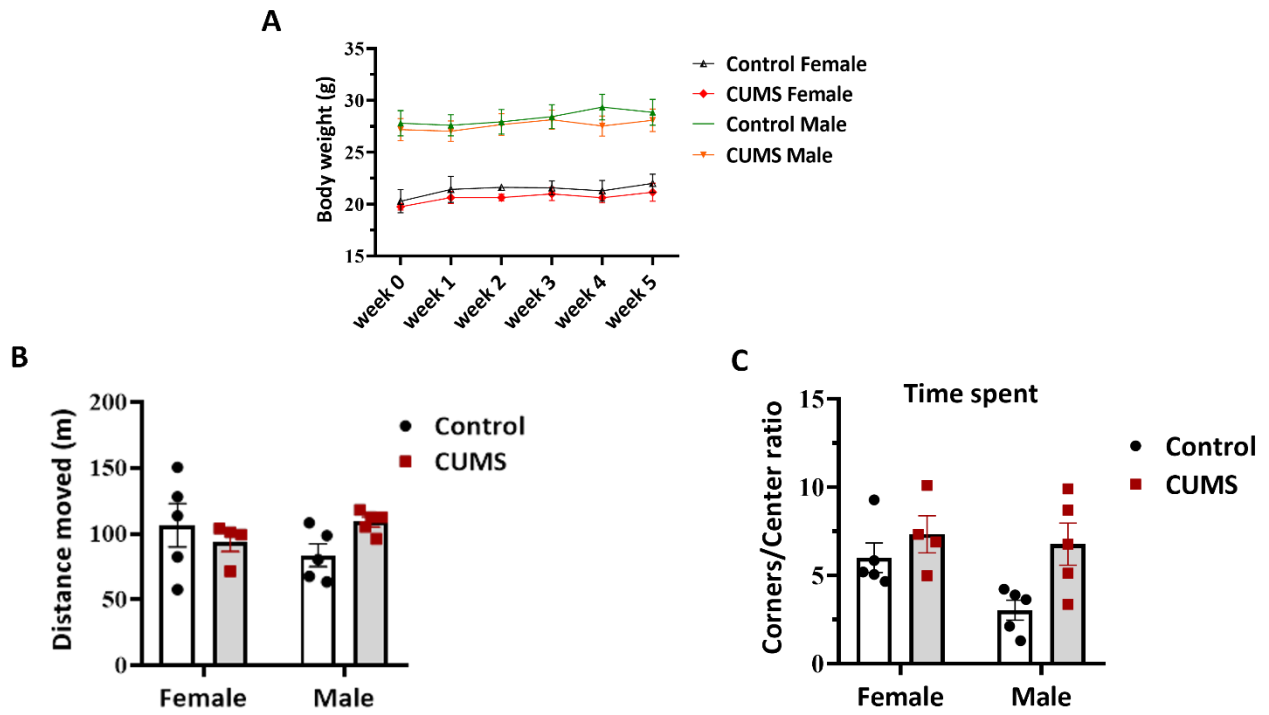

**Supplementary figure 2. Percentages of astrocytes and OPCs in the hippocampus.** Representative dot plots of isotype control antibodies **(A)** used in flow cytometric analysis and cell-specific staining for astrocytes and OPCs **(B)** are shown. Percentage of astrocytes **(C)** and percentage of OPCs **(D)** present among total brain cells present in the hippocampus. CUMS main effect on OPCs **(D, F (1, 15) = 9.44,  $p < 0.01$ )** and sex main effect on astrocytes **(C, F (1, 15) = 8.5,  $p < 0.01$ , 2-way ANOVA)** were observed, respectively.

**A**

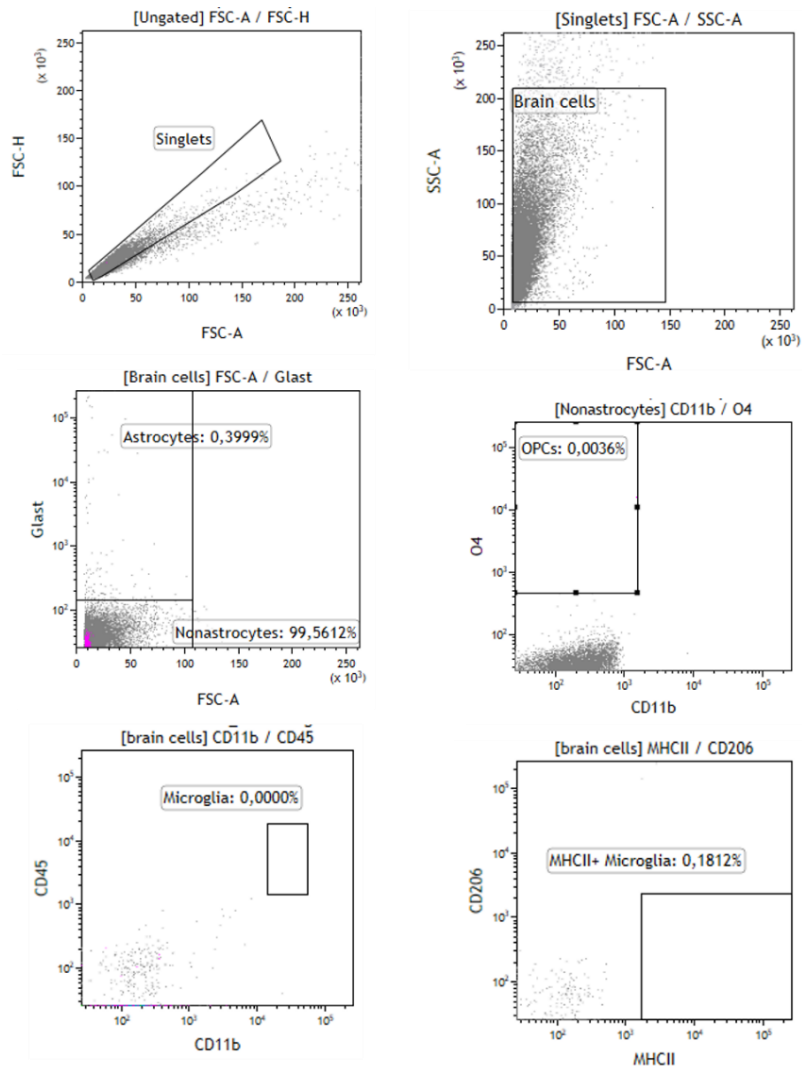

**B**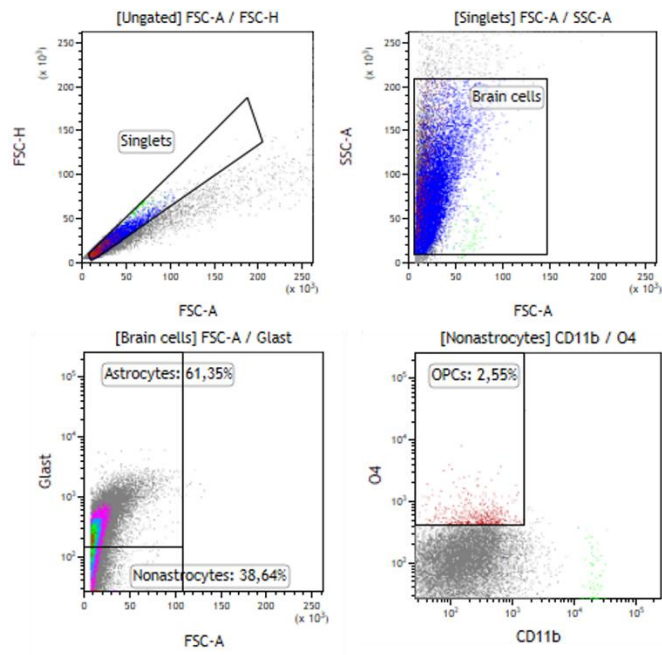**C**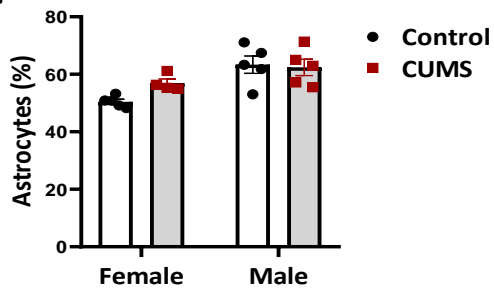**D**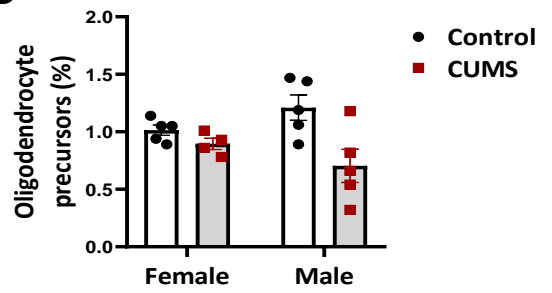

**Supplementary figure 3.** Human Protein Atlas (HPA) dataset. Brain expression data obtained through RNA-seq generated reported as normalized expression (NX) for human prefrontal cortex samples. Color coding of the bars separates prefrontal cortex and the three reference cortex regions (frontal, parietal and temporal) (<https://www.proteinatlas.org/>).

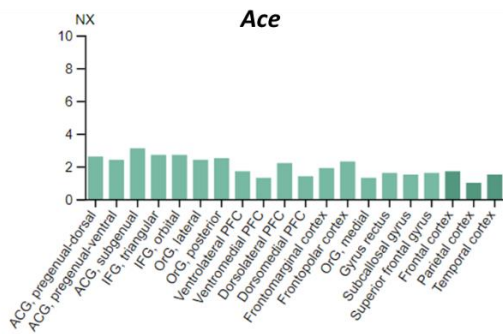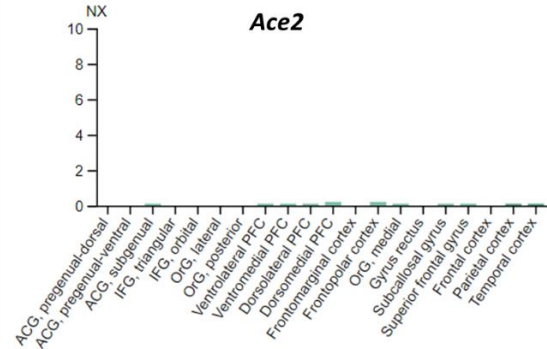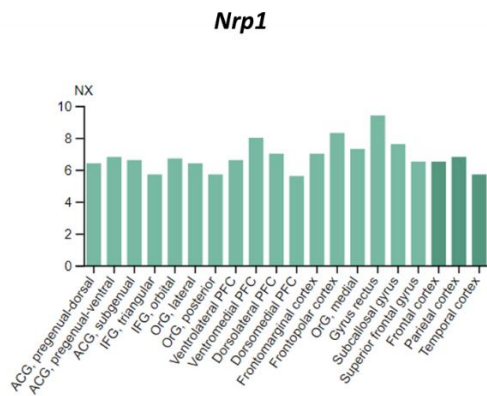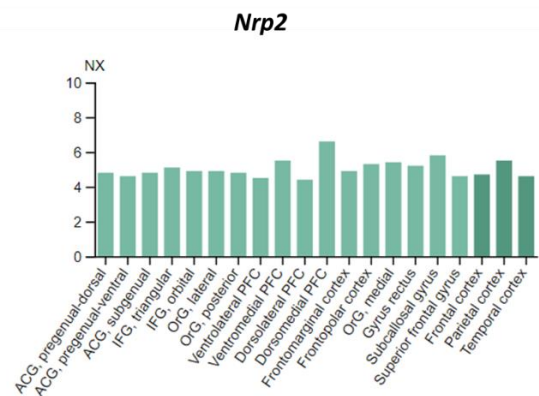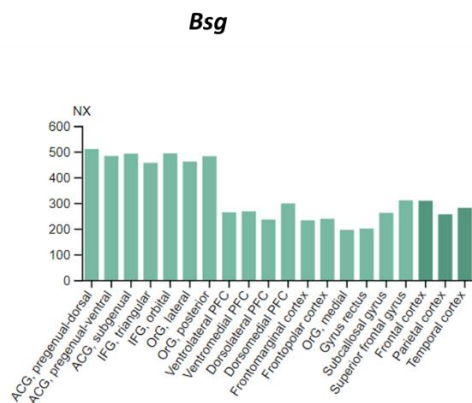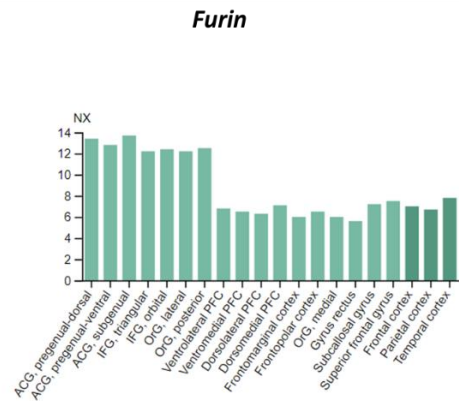

**Supplementary figure 4.** Brain Rnaseq database from Barres's lab (<https://www.brainrnaseq.org/>) was used for checking cell-specific expressions of *Ace*, *Ace2*, *Nrp1*, *Nrp2*, *Bsg* and *Furin* genes in the normal mouse and human brains.

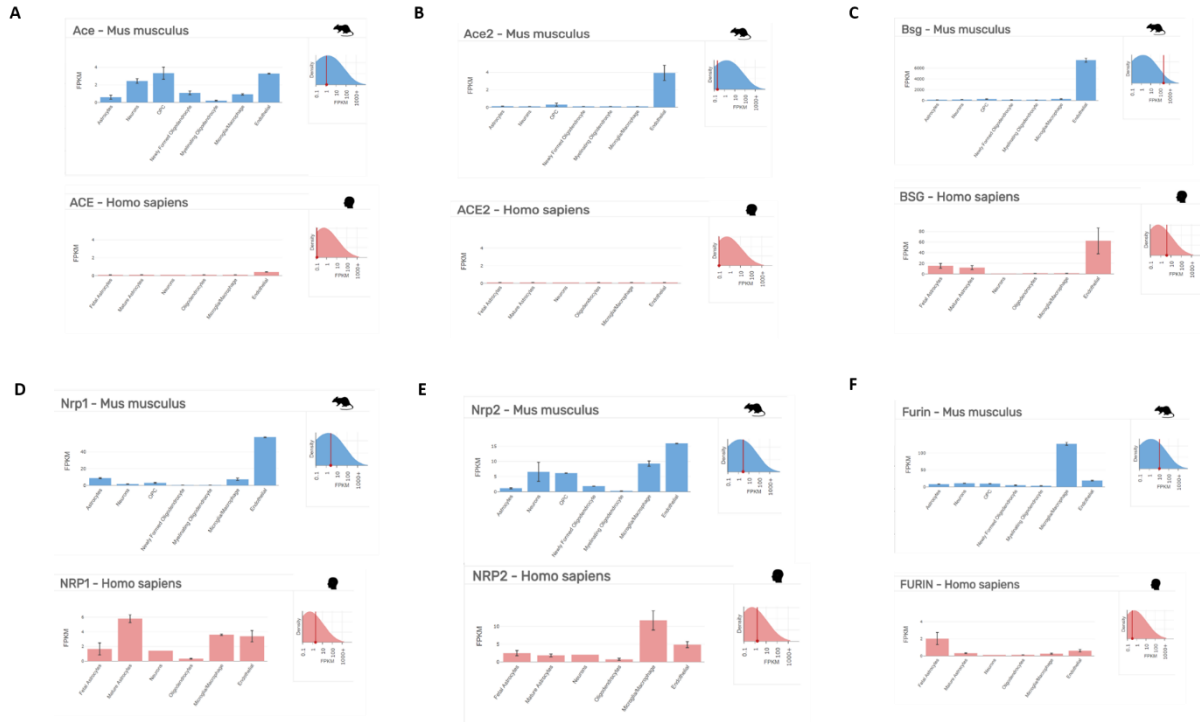

**Supplementary figure 5.** Brain vascular single-cell database from Belsholtz lab (<http://betsholtzlab.org/VascularSingleCells/database.html>) was used for cell type distribution of *Ace*, *Ace2*, *Nrp1*, *Nrp2*, *Bsg* and *Furin* genes in the mouse brain. The different cells are namely Pericytes, venous SMC, arteriolar SMC, arterial SMC, Microglia, fibroblast-like type 1, fibroblast-like type 2, Oligodendrocytes, EC type 1, EC type 2, EC type 3, venous EC, capillary EC, arterial EC and Astrocyte. The abbreviations are PC - Pericytes; SMC - Smooth muscle cells; MG - Microglia; FB - Vascular fibroblast-like cells; OL - Oligodendrocytes; EC - Endothelial cells; AC - Astrocytes; v - venous; capil - capillary; a - arterial; aa - arteriolar; 1,2,3- subtypes.

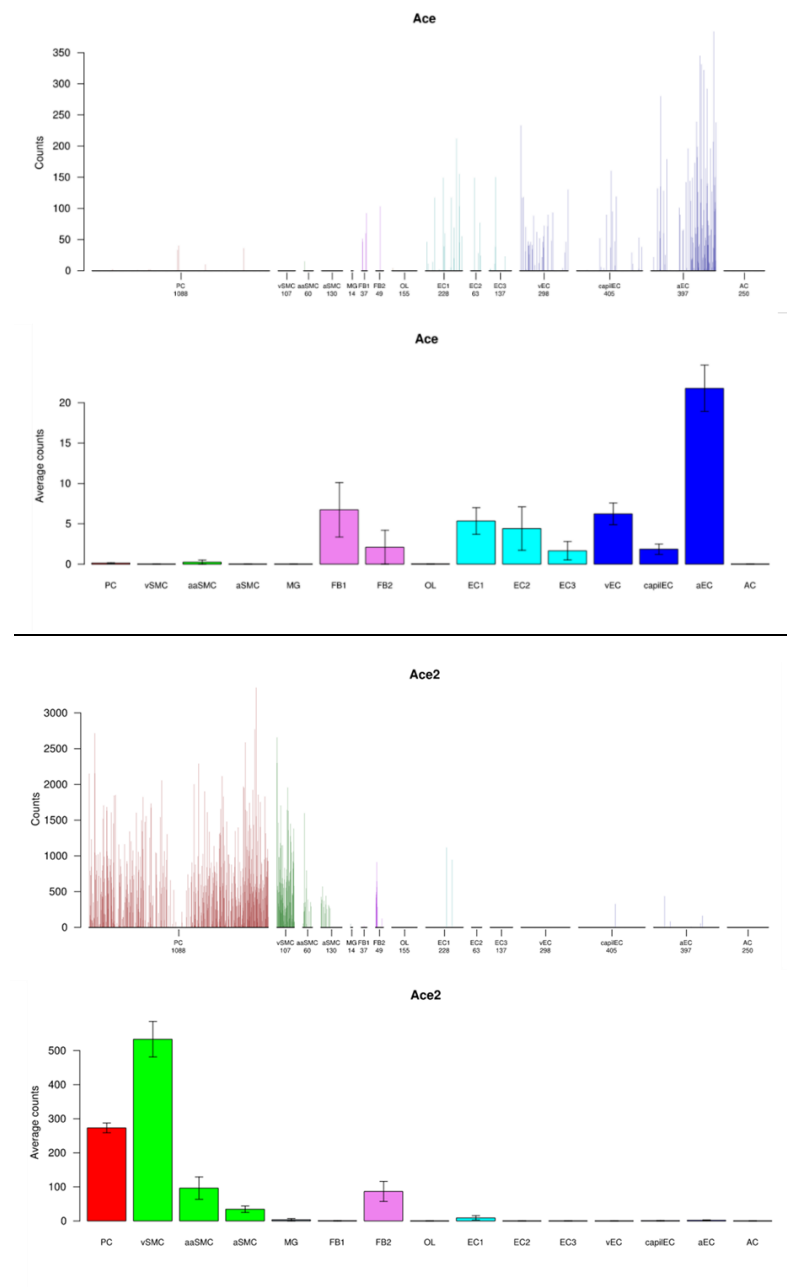

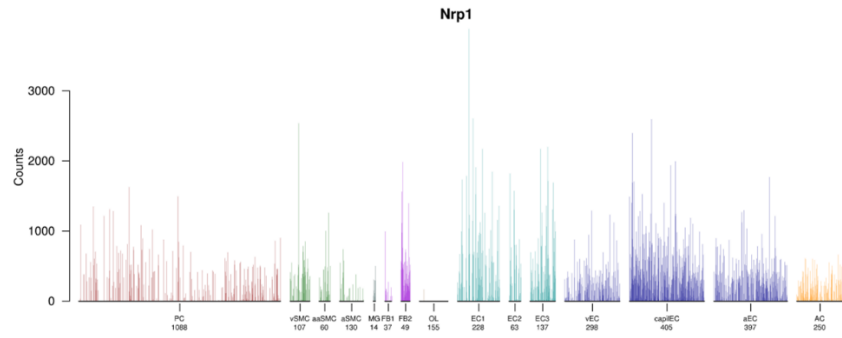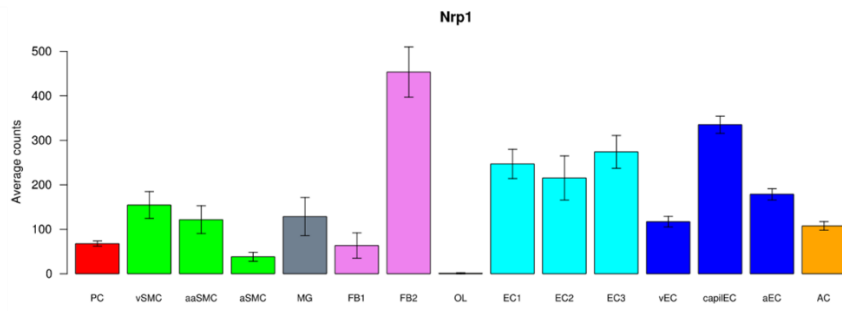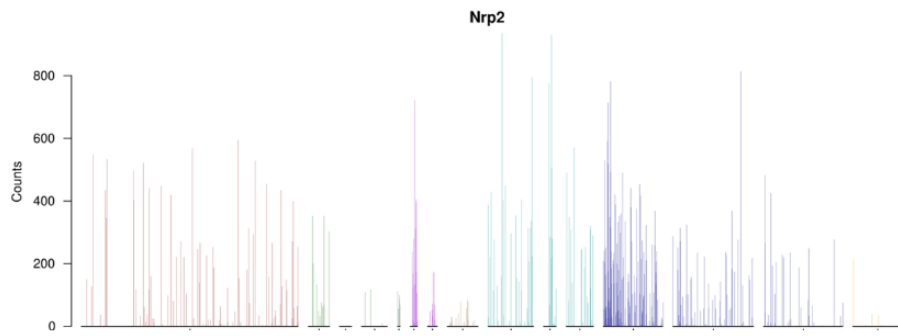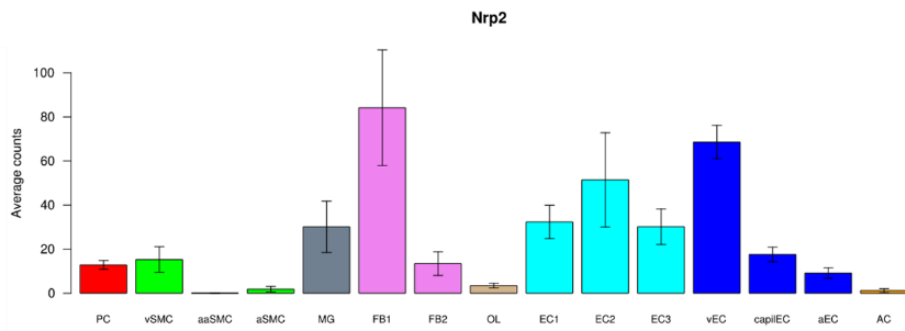

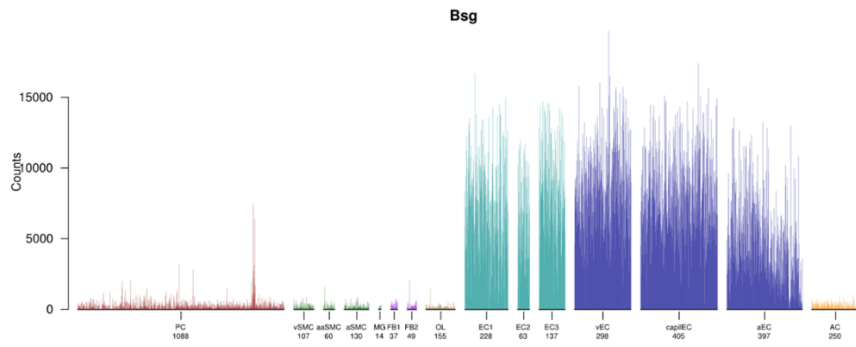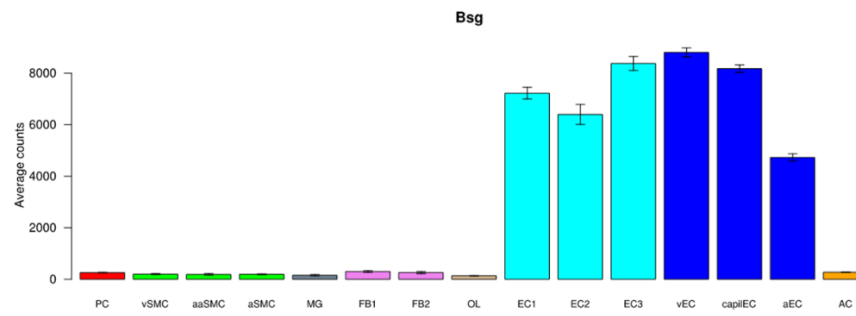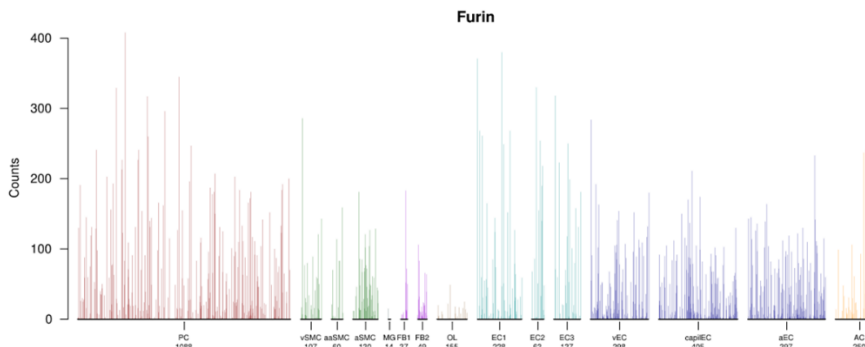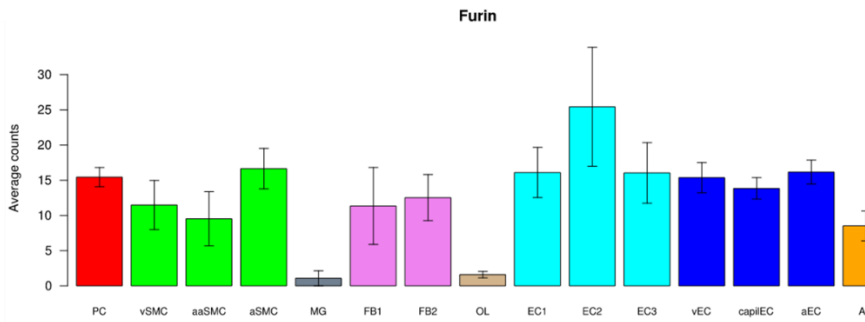



**Supplementary figure 6.** Single-cell RNA sequencing data of *Ace*, *Ace2*, *Nrp1*, *Nrp2*, *Bsg* and *Furin* genes in different cell subtypes in the mouse prefrontal cortex (<http://djeknad.pythonanywhere.com/>, Bhattacharjee et al., 2019). Representative Track plots for all the 6 genes in different cell types are given below.

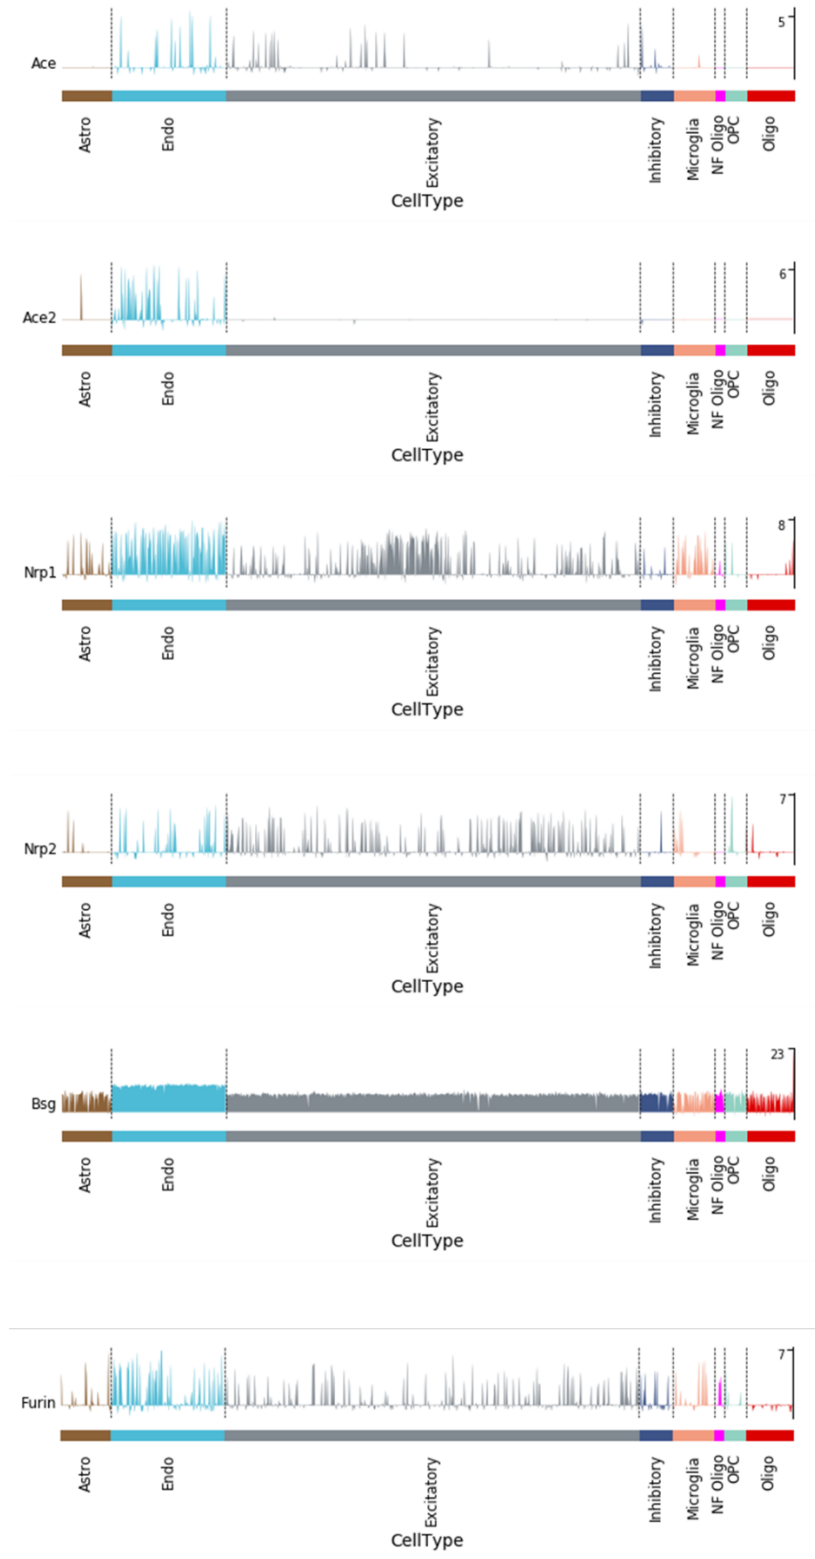

**Supplementary figure 7:** SARS CoV2 viral receptors and pro-inflammatory cytokine genes expressed in the female and male brains. *Ace*, *Ace2b*, *Nrp1*, *Nrp2*, *Furin*, *Tnf*, *Il7* and *Il1b* mRNA expressions were studied using RT-QPCR. CUMS main effects on *Ace2b* (B,  $F(1, 15) = 9.37, p < 0.01$ ) and *Il7* (G,  $F(1, 15) = 11.77, p < 0.01$ ) and sex main effect on *Nrp1* (C,  $F(1, 15) = 8.00, p < 0.05$ ) were observed, respectively (2-way ANOVA).

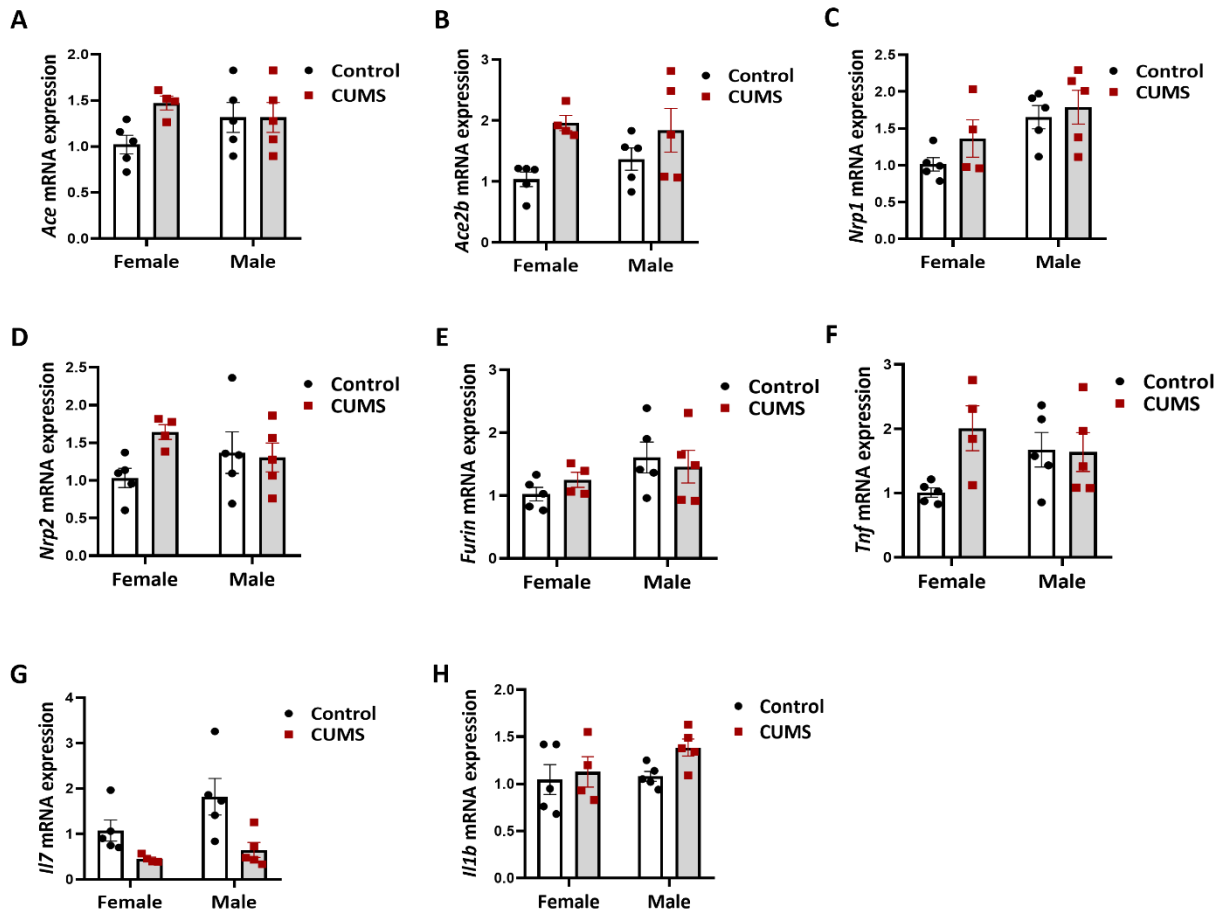

**Supplementary table 1.** Primers designed for *Ace*, *Ace2*, *Nrp1*, *Nrp2*, *Bsg* and *Furin* genes for expression studies in mice.

| Gene name                       | Primer Sequence 5'-3' |                         |
|---------------------------------|-----------------------|-------------------------|
| <i>Ace2a</i>                    | Forward               | CTACAGGCCCTTCAGCAAAG    |
|                                 | Reverse               | TGCCCAGAGCCTAGAGTTGT    |
| <i>Ace2b*</i>                   | Forward               | TCCATTGGTCTTCTGCCATCC   |
|                                 | Reverse               | AACGATCTCCCGCTTCATCTC   |
| <i>Ace</i>                      | Forward               | CCACTGACAGAATGGCTCGT    |
|                                 | Reverse               | GTGGGTGTAGTACCGGTGTTT   |
| <i>Bsg</i>                      | Forward               | ACTGGGGAAGAAGAGGCAATC   |
|                                 | Reverse               | AACCAACACCAGGACCTCAG    |
| <i>Nrp1</i>                     | Forward               | GGAGCTACTGGGCTGTGAAG    |
|                                 | Reverse               | ACCGTATGTCGGGAACTCTG    |
| <i>Nrp2</i>                     | Forward               | CTGGTTAGTAGCCGCTCTGG    |
|                                 | Reverse               | TCCCAGTCCTTGCCATTTAG    |
| <i>Furin</i>                    | Forward               | CATTCGTATGGCTACGGGCT    |
|                                 | Reverse               | GGGCTGATGAGGTGGATAGC    |
| <i>Il7</i>                      | Forward               | CTAAATCGTGCTGCTCGCAA    |
|                                 | Reverse               | TTCACCAGTGTTTGTGTGCC    |
| <i>Tnf</i>                      | Forward               | ATGGCCTCCCTCTCATCAGT    |
|                                 | Reverse               | TTTGCTACGACGTGGGCTAC    |
| <i>Il1b</i>                     | Forward               | TGGACCTCCAGGATGAGGACA   |
|                                 | Reverse               | GTTTCATCTCGGAGCCTGTAGTG |
| <i><math>\beta</math>-actin</i> | Forward               | ACTGAGCTGCGTTTTACACCC   |
|                                 | Reverse               | GCCTTCACCGTTCCAGTTTT    |

\*published primers from Ma et al., 2020.

**Supplementary table 2.** Spatial distribution of these genes in the frontal cortex brain areas namely the anterior cingulate cortex, prelimbic area, infralimbic area and the orbital area of mice.

| Frontal cortex brain areas |                                                  |                           |                         |                                           |
|----------------------------|--------------------------------------------------|---------------------------|-------------------------|-------------------------------------------|
|                            | Anterior cingulate cortex                        | Prelimbic area            | Infralimbic area        | Orbital area                              |
| <b>Ace</b>                 | -                                                | -                         | -                       | Orbital Area, ventral part, layer 2/3     |
|                            | -                                                | -                         | -                       | Orbital area, lateral part, layer 6a      |
|                            | -                                                | -                         | -                       | Orbital area, medial part, layer 5        |
| <b>Ace2</b>                | Anterior cingulate area, dorsal part, layer 6a   | Prelimbic area, layer 5   | -                       | -                                         |
| <b>Nrp1</b>                | -                                                | -                         | -                       | -                                         |
| <b>Nrp2</b>                | -                                                | -                         | Infra limbic, layer 2   | Orbital area, lateral part, layer 2/3     |
|                            | -                                                | -                         | Infra limbic, layer 2/3 | Orbital area, lateral part, layer 5       |
|                            | -                                                | -                         | Infra limbic, layer 5   | Orbital area, ventrolateral part, layer 5 |
|                            | -                                                | -                         | Infra limbic, layer 6b  | Orbital area, ventrolateral layer 2/3     |
|                            | -                                                | -                         |                         | Orbital area, lateral part, layer 6a      |
|                            | -                                                | -                         |                         | Orbital area, lateral part, layer 6b      |
|                            | -                                                | -                         |                         | Orbital area, ventrolateral layer 6b      |
| <b>Bsg</b>                 | Anterior cingulate area, Ventral part, layer 5   | Prelimbic area, layer 2   | -                       | Orbital area, medial part, layer 2/3      |
|                            | Anterior cingulate area, Ventral part, layer 6a  | Prelimbic area, layer 5   | -                       | Orbital area, lateral part, layer 6a      |
|                            | Anterior cingulate area, Ventral part, layer 2/3 | Prelimbic area, layer 2/3 | -                       | Orbital area, medial part, layer 6a       |
|                            | Anterior cingulate area, Dorsal part, layer 5    |                           | -                       | Orbital area, lateral part, layer 5       |
|                            | Anterior cingulate area, Dorsal part, layer 2/3  |                           | -                       | Orbital area, medial part, layer 2        |
|                            |                                                  |                           | -                       | Orbital area, medial part, layer 5        |

|              |                                                 |                         |                          |                                             |
|--------------|-------------------------------------------------|-------------------------|--------------------------|---------------------------------------------|
|              |                                                 |                         | -                        | Orbital area, ventrolateral part, layer 5   |
|              |                                                 |                         | -                        | Orbital area, ventrolateral part, layer 2/3 |
|              |                                                 |                         | -                        | Orbital area, lateral part, layer 2/3       |
|              |                                                 |                         | -                        | Orbital area, lateral part, layer 6b        |
|              |                                                 |                         |                          |                                             |
| <b>Furin</b> | Anterior cingulate area, Dorsal part, layer 6a  | Prelimbic area layer 6a | Infralimbic layer 6b     | Orbital area, medial part, layer 2/3        |
|              | Anterior cingulate area, ventral part           | Prelimbic area layer 6b | Infralimbic area layer 5 | Orbital area, ventrolateral part, layer 2/3 |
|              | Anterior cingulate area, dorsal part, layer 2/3 | Prelimbic area layer 5  | Infralimbic layer 6a     | Orbital area, ventrolateral part, layer 5   |
|              | Anterior cingulate area, dorsal part, layer 5   |                         |                          | Orbital area, ventral part, layer 6a        |
|              | Anterior cingulate area, dorsal part, layer 6b  |                         |                          | Orbital area, medial part, layer 6a         |
|              |                                                 |                         |                          | Orbital area, ventrolateral, part 6a        |
|              |                                                 |                         |                          | Orbital area, medial part, layer 2          |
|              |                                                 |                         |                          | Orbital area, ventrolateral                 |
|              |                                                 |                         |                          |                                             |
